# Supplementary material for: SNP barcodes provide higher resolution than microsatellite markers to measure Plasmodium vivax population genetics
Source: Malar J. 2020 Oct 20;19:375. doi: 10.1186/s12936-020-03440-0 (PMC7576724; doi:10.1186/s12936-020-03440-0)
Supplement: Supplementary file 3 — Additional file 3: Table S2. Details of 178 SNPs, SNPs included in final panel (n = 146), primers sequences and their multiplex setting. [file 12936_2020_3440_MOESM3_ESM.xlsx]

## Sheet: Table S2
Candidate	Chromosome	Position	MAFa	Effect	R/Ab	SNP number	Forward primers	Reverse primers	Multipex set	Final panel
SNP1	Pv_Sal1_chr01	98996	0.29	synonymous_variant	G/A	SNP1	CTACGTGGCTGTCTTGTC	TTGGCTGCAACTAGAGGA	1	SNP1
SNP2	Pv_Sal1_chr01	131318	0.37	synonymous_variant	A/G	SNP2	CTATACTGATCGTCGAGGTC	CGTACACTTGATGCACAAC	1	SNP2
SNP3	Pv_Sal1_chr01	242500	0.31	intergenic_region	C/A	SNP3	GCAGCTATGAAGCTATGAAG	GCGGTGGATTATGACCAT	1	SNP3
SNP4	Pv_Sal1_chr01	411085	0.39	intergenic_region	C/T	SNP4	GGACAGTATGAGCCACTT	CTTCACTCCTTCCGTTCT	1	SNP4
SNP5	Pv_Sal1_chr01	411394	0.43	intergenic_region	G/A	SNP5	GAATGAACGCCGCTTACT	GCATACGCTTCCACCTAA	1	SNP5
SNP6	Pv_Sal1_chr01	693796	0.28	intergenic_region	G/A	SNP6	TGTTACGATGACTACTGCTA	TTACGAGTGACACATGAGAT	1	SNP6
SNP7	Pv_Sal1_chr01	744796	0.34	intergenic_region	G/C	SNP7	GAACAGCGAAGGTGATAGA	GCATCCTACCGTGAGAAG	1	SNP7
SNP8	Pv_Sal1_chr02	110432	0.36	intergenic_region	A/G	SNP8	CACCCGAAGAGGAAGAAG	TTGAAGGCGAAGGATATGTT	1	SNP8
SNP9	Pv_Sal1_chr02	241174	0.34	synonymous_variant	G/A	SNP9	AACGGACGAATGGGATGA	CCTTCACTTGTTCTCACCT	2	SNP9
SNP10	Pv_Sal1_chr02	526842	0.31	intergenic_region	G/A	SNP10	ACTCGTTAAGCAACTTCAGT	ATGGCGACTCTCCTCTGT	2	SNP10
SNP11	Pv_Sal1_chr02	584728	0.42	synonymous_variant	A/C	SNP11	GGGAGGTAACTCATCAGGCT	GTGTATCATGGAAGGACGAA	2	SNP11
SNP12	Pv_Sal1_chr02	693724	0.29	intergenic_region	A/G	SNP12	GCACTTACCTCACTCATTCA	TGTGTATATGCAAGTCGTAC	2	SNP12
SNP13	Pv_Sal1_chr03	51241	0.29	intergenic_region	T/G	SNP13	GGCACTTACCTCACTCATTCA	TGACGAGGAGGAGGATGA	2	SNP13
SNP14	Pv_Sal1_chr03	64428	0.37	intergenic_region	G/A	SNP14	GCAGTCACGCTAATGGTC	CCTTATTTCCGCTCAATTGT	2	SNP14
SNP15	Pv_Sal1_chr03	86731	0.41	synonymous_variant	C/T	SNP15	CGTGTAACCCACTCAAAC	GACGAATTATACAGACGAAGG	2	SNP15
SNP16	Pv_Sal1_chr03	186319	0.48	intergenic_region	G/T	SNP16	CGCACGATATGGGAATGT	GCTGAAACGAGATCAAACTT	2
SNP17	Pv_Sal1_chr03	366456	0.3	synonymous_variant	T/C	SNP17	TCTTTCACTGTGGGATAAGG	GAGCAGAAGGAACGAACC	2
SNP22	Pv_Sal1_chr04	129155	0.3	intergenic_region	A/C	SNP18	GGCGTGAAACAAATGAACC	ATGAACTGCTCCACCCAA	3	SNP16
SNP23	Pv_Sal1_chr04	174497	0.29	synonymous_variant	C/T	SNP19	TGTGTACGAGAATAGGAGTAG	CAGGAGAAAGACCAACCAA	3	SNP17
SNP24	Pv_Sal1_chr04	614235	0.41	synonymous_variant	C/T	SNP20	GGCAGGTTTGTTTGTTTCG	ATTCCAGGTGCATGTCCA	3	SNP18
SNP25	Pv_Sal1_chr04	616084	0.5	intergenic_region	A/G	SNP21	AGGTATTCCCAAACTGTTGA	GACTTAGACTCGGCTACTTT	3	SNP19
SNP26	Pv_Sal1_chr04	668820	0.41	synonymous_variant	G/C	SNP22	GTGTCCCTTTATCTCTCCAT	TGTGGTGATCGCTCTGTA	3	SNP20
SNP18	Pv_Sal1_chr04	719437	0.37	synonymous_variant	G/C	SNP23	TACATTCTGAGTAGCGTGTT	CAGACGAACTGGCAATCA	3	SNP21
SNP27	Pv_Sal1_chr04	787836	0.3	intergenic_region	C/T	SNP24	GCTTCCTACCTCCTACGA	GCTTCTCATTCACCTCCAT	3	SNP22
SNP19	Pv_Sal1_chr04	791004	0.32	synonymous_variant	T/C	SNP25	CATTTCCACTGAGGTTGC	TTACGAAGCGGATGAATAAC	4	SNP23
SNP20	Pv_Sal1_chr04	848945	0.43	intergenic_region	A/C	SNP26	ATAATCCGCCCTGACGAG	GAACACCGAGATGCTGAA	4	SNP24
SNP21	Pv_Sal1_chr04	961008	0.4	intergenic_region	A/G	SNP27	GGATGAGTCGGAAGAAGTTA	TCGTTTGGTAGAATGACACT	4	SNP25
SNP28	Pv_Sal1_chr05	76667	0.28	intergenic_region	T/A	SNP28	TCGTAAGAATGACTCCCTTC	GTGCGTATCTGCCTATGT	4	SNP26
SNP29	Pv_Sal1_chr05	78725	0.42	intergenic_region	A/G	SNP29	CGAGTGGGTTTCGCTTAAAG	GCGCGGCAATAATGCAAA	4	SNP27
SNP30	Pv_Sal1_chr05	87715	0.29	intergenic_region	G/A	SNP30	CATGTTGGCAGACATTCTT	TCCCGCTGTGTAATTTCA	4	SNP28
SNP31	Pv_Sal1_chr05	309065	0.31	synonymous_variant	G/A	SNP31	GACGCTTCTCTTGGTTAAG	CTCTGTGCTTGGGTGTTC	5	SNP29
SNP32	Pv_Sal1_chr05	384287	0.3	intergenic_region	C/G	SNP32	TTGAGCAGATGCAGAAGG	CCGTATAGTTAGCCGTATAGT	5	SNP30
SNP33	Pv_Sal1_chr05	460733	0.34	synonymous_variant	G/A	SNP33	ACCTCACGAGGGTGTTAA	CCTTGAGAAGATGCCTATTG	5	SNP31
SNP34	Pv_Sal1_chr05	628550	0.34	intergenic_region	C/T	SNP34	GGTATATGGTTACGCTTGTG	CAGTTGCTAATTCCTGTGTT	5	SNP32
SNP35	Pv_Sal1_chr05	638361	0.3	synonymous_variant	C/G	SNP35	CTGTAGGTGAAGAAGAACAAG	AATTCTGGAGGCGATGAAG	5	SNP33
SNP36	Pv_Sal1_chr05	828375	0.3	intergenic_region	A/G	SNP36	GGACAACTAATAACGAACTG	AGCAGCAAAGTGGTAGAT	5	SNP34
SNP37	Pv_Sal1_chr05	918751	0.41	intergenic_region	G/A	SNP37	ACTCCTCACATAAGGTCGTA	TTTCCACACAGTGTCCAC	5	SNP35
SNP38	Pv_Sal1_chr05	1198213	0.36	intergenic_region	A/C	SNP38	GACGAGGGCTACGAATGA	CAACGCTGTGTCGCTAAC	5	SNP36
SNP39	Pv_Sal1_chr05	1198961	0.46	intergenic_region	C/G	SNP39	AATGTGGATGGCGTGGTT	AATGGACTCCGCACTTGG	5	SNP37
SNP40	Pv_Sal1_chr05	1218069	0.44	synonymous_variant	T/C	SNP40	CATGTATAATCCACCGTCAT	CCACTCATGCCTCTACAC	5	SNP38
SNP41	Pv_Sal1_chr05	1247196	0.35	intergenic_region	T/A	SNP41	CGAGATTGCTCAGGTGAA	CCGAGTGACCAACTCTTTA	6
SNP42	Pv_Sal1_chr05	1274610	0.41	intergenic_region	G/A	SNP42	CCGATACCGCCAAAGATAT	TTGTTCTCTGCTTCCTTCC	6	SNP39
SNP43	Pv_Sal1_chr05	1291376	0.28	intergenic_region	C/T	SNP43	AAGGATTGTAGAGCCAGGAT	GCAGCATCGCTTCGTTAT	6	SNP40
SNP44	Pv_Sal1_chr05	1295863	0.42	intergenic_region	T/C	SNP44	CACCATACGGAGATAGAAGT	CGGTTACAACTCGTTATGAC	6	SNP41
SNP45	Pv_Sal1_chr06	308050	0.35	intergenic_region	G/T	SNP45	AACGACTGAATCGACTTACA	GGGAAACAGTGAGGCAAA	6
SNP46	Pv_Sal1_chr06	441983	0.33	synonymous_variant	G/T	SNP46	GTCGTTTCTCGTCTTCCT	TGACTTCATTCCATTCACTG	6	SNP42
SNP47	Pv_Sal1_chr06	495367	0.29	intergenic_region	C/T	SNP47	CTTCTTCTCATTCTCCTTCTTC	CGTGCAGGTTATAGTCTCTT	6
SNP48	Pv_Sal1_chr06	495896	0.3	intergenic_region	G/T	SNP48	AGCCGCTAAAGCAAAGTAT	CCAACATTGTTAGAAGAGAAGG	6	SNP43
SNP49	Pv_Sal1_chr06	495984	0.35	intergenic_region	T/G	SNP49	AAACTGGAAAGGCAAAGGA	TCACATCGCATCGCTTAG	6	SNP44
SNP50	Pv_Sal1_chr06	496874	0.36	intergenic_region	C/G	SNP50	CAGTACCGAGTGGATGGT	GGAACGATGAGGTGAAATAATG	6	SNP45
SNP51	Pv_Sal1_chr06	516289	0.29	intergenic_region	A/T	SNP51	GGTCGTCTCTTCCTTCTG	CTCCCGCTTTCCTATTCG	7	SNP46
SNP52	Pv_Sal1_chr06	519552	0.29	intergenic_region	C/T	SNP52	ATTTGGCTGCTCATCTCTC	TGTTGGATGTCACTCGTATT	7	SNP47
SNP53	Pv_Sal1_chr06	520153	0.43	intergenic_region	T/G	SNP53	GAAGCCAAGGAAGTCACA	TTCCTCCTCTCCTTATTCTCT	7	SNP48
SNP54	Pv_Sal1_chr06	861387	0.34	intergenic_region	G/T	SNP54	TGAAATACGAGAGTCCCTTT	ACGAATTACTGCCCATCC	7	SNP49
SNP55	Pv_Sal1_chr06	878634	0.28	intergenic_region	G/A	SNP55	TGACTCTTTGGAACTGTGTA	CCGCTAAGTTGCTGAATTG	7
SNP56	Pv_Sal1_chr06	921884	0.39	intergenic_region	A/C	SNP56	GGTTGATCTTGCCAGTAGT	AGACGAATTAACAAGTACGC	7	SNP50
SNP57	Pv_Sal1_chr06	926494	0.48	intergenic_region	T/C	SNP57	GGGAGTGTTAAGTTAGTTTGG	GCATCAATGTGAGGAGAGT	7	SNP51
SNP58	Pv_Sal1_chr06	931679	0.42	intergenic_region	C/T	SNP58	CGATGGGTACACATGAGAT	CCTACGGGTGACTGACTT	7	SNP52
SNP59	Pv_Sal1_chr07	255886	0.49	intergenic_region	T/A	SNP59	CGTCTGAGAAGTTCATTTGT	GGAATAACTGATGCAACCAT	7	SNP53
SNP60	Pv_Sal1_chr07	298866	0.48	intergenic_region	T/G	SNP60	GCGTGTTCGTGGTTATGT	GCTGCGTTGCTACTTTGT	7	SNP54
SNP61	Pv_Sal1_chr07	354452	0.4	intergenic_region	G/A	SNP61	GAGGTGGACTGCTTGAAG	CTGACAGATGAGTGGTTCTT	8	SNP55
SNP62	Pv_Sal1_chr07	471702	0.41	intergenic_region	G/A	SNP62	CGAGTGGTTTAGCGAGTA	TGAAATGTGCCCAGGATAA	8
SNP63	Pv_Sal1_chr07	537501	0.47	intergenic_region	T/C	SNP63	TTAGTTAGCGGCGTTAGTTA	AGCAGTTTCCCTGTAGTTC	8	SNP56
SNP64	Pv_Sal1_chr07	664154	0.33	intergenic_region	A/G	SNP64	TATCCTCCACGGTTGCTA	CGCTTCTACTAAGGTAACG	8	SNP57
SNP65	Pv_Sal1_chr07	840393	0.32	intergenic_region	G/A	SNP65	CCCTTCCGGTTAAGTGAAA	CGTGTTCGCTCTACCTTC	8
SNP66	Pv_Sal1_chr07	898225	0.31	intergenic_region	A/G	SNP66	GGAAGAAGTTGCCCTACG	TGAGCGGAACAACACAAT	8	SNP58
SNP67	Pv_Sal1_chr07	898747	0.38	intergenic_region	G/A	SNP67	GCGAGCCATAAAGAAGAAT	TACCAAACACTGGGAACATA	8	SNP59
SNP68	Pv_Sal1_chr07	898891	0.29	intergenic_region	G/A	SNP68	GCAAAGCAGAGACAGTCA	CTAATCACGCACATGAGGT	8
SNP69	Pv_Sal1_chr07	965519	0.33	synonymous_variant	C/G	SNP69	GATGTCCCTGAGCAGTGT	GCTGAGTGACGAGGAAGT	9	SNP60
SNP70	Pv_Sal1_chr07	1063951	0.44	intergenic_region	C/T	SNP70	GCCAACTTCGTCACAACT	TGAGCAGATTCCTCCACC	9	SNP61
SNP71	Pv_Sal1_chr07	1365260	0.48	intergenic_region	G/C	SNP71	AGATGAAGAAGAAGGAGGTC	TTCGTGCGTCTCTATATCAT	9	SNP62
SNP72	Pv_Sal1_chr07	1398575	0.33	intergenic_region	A/G	SNP72	GAATTGTCGAGCAGAAGTG	TGTCATGCGTTCATTGGT	9
SNP73	Pv_Sal1_chr08	241161	0.35	intergenic_region	C/T	SNP73	TAACATTTCCTGGCTACCC	AACTGAGCTGCCTTATGC	9	SNP63
SNP74	Pv_Sal1_chr08	274404	0.43	intergenic_region	T/G	SNP74	CTCCGTTGCTTTAGTTATTCC	GTATGCCACCTTCGTGAG	9	SNP64
SNP75	Pv_Sal1_chr08	292049	0.44	intergenic_region	G/A	SNP75	GCTTCAGCTATTCCACAAC	AAGTCGGCACAGTTTCAT	9	SNP65
SNP76	Pv_Sal1_chr08	526744	0.34	intergenic_region	C/T	SNP76	TCACTTCTCAGCATCTTGG	AAGCAGTTGGACAAGAGG	9	SNP66
SNP77	Pv_Sal1_chr08	593596	0.3	intergenic_region	C/T	SNP77	GGCACAAATTATGCACAAC	GCTAATCGCTCCAGTGAA	9
SNP78	Pv_Sal1_chr08	650485	0.43	intergenic_region	C/T	SNP78	CTTAACCAGCTTAACAGAAGG	CTTAACGGGTGAGGCAAA	9	SNP67
SNP79	Pv_Sal1_chr09	202563	0.49	synonymous_variant	T/A	SNP79	ACGTTGAATGCCGATCTT	CATACCCTTGTGTACTTCTAC	10	SNP68
SNP80	Pv_Sal1_chr09	488312	0.48	intergenic_region	T/G	SNP80	GCTCCCATAATTTGGAACAA	CTGCGTCTACGATCTGAG	10	SNP69
SNP81	Pv_Sal1_chr09	1135795	0.4	intergenic_region	G/A	SNP81	CTACCTCCGTTCGCCTAT	TTAATCGGTGAAGCCATGAA	10	SNP70
SNP82	Pv_Sal1_chr09	1522321	0.41	intergenic_region	G/A	SNP82	AATATGTCCCTCTATGTGAACC	AAGACGAACGATGCTCCA	10	SNP71
SNP83	Pv_Sal1_chr09	1645534	0.47	intergenic_region	T/C	SNP83	TTTCGCACAACCATTTAAGG	GCAACGGCAGAATAACCA	10	SNP72
SNP84	Pv_Sal1_chr09	1667312	0.33	intergenic_region	A/G	SNP84	GCAACTTATATGCCAATGTG	ACATCTCCGTAGAGAACCT	10	SNP73
SNP85	Pv_Sal1_chr09	1685987	0.32	intergenic_region	G/A	SNP85	TCATCCTTCGTTCATTGTTC	AATCGCCGTACACGTATG	10	SNP74
SNP86	Pv_Sal1_chr09	1722102	0.31	intergenic_region	A/G	SNP86	AGGTGTGACAAATGGGAAA	AATCCGCCAATTCGTCTC	10	SNP75
SNP87	Pv_Sal1_chr09	1722174	0.38	intergenic_region	G/A	SNP87	AGCATAGTATCGCATCGC	CTGGAGTGACACGCATAG	10	SNP76
SNP88	Pv_Sal1_chr09	1872445	0.29	intergenic_region	G/A	SNP88	TGTTCACATCATGCGAGAT	ACTGCTTTGCGGAGTTAC	10
SNP89	Pv_Sal1_chr10	484132	0.33	intergenic_region	C/G	SNP89	TTTGCCATTCGCCCTTTA	AGCATTAGCAGCAAGTGTA	11	SNP77
SNP90	Pv_Sal1_chr10	536829	0.44	synonymous_variant	T/G	SNP90	AACGATCTGAGCAACACAT	GGTCCTCCAGCACATAGT	11	SNP78
SNP91	Pv_Sal1_chr10	644427	0.44	intergenic_region	G/T	SNP91	CAGATCAGGCAGTGAGTAC	GGACACTATGAATCAGCTAGA	11	SNP79
SNP92	Pv_Sal1_chr10	720224	0.42	intergenic_region	T/C	SNP92	TACCAGTGAGGGAGAGAAGA	TCATCGTCCTCTGCTTGG	11	SNP80
SNP93	Pv_Sal1_chr10	812911	0.43	synonymous_variant	T/C	SNP93	TGATGGACTACCTGAATAGC	AAATAGACCCTCTCGCAAAT	11	SNP81
SNP94	Pv_Sal1_chr10	982506	0.45	synonymous_variant	C/G	SNP94	GTTTGGCGATGGAGGTTT	AAGATGTGAGTGGAAGGAAG	11	SNP82
SNP95	Pv_Sal1_chr10	1038969	0.33	intergenic_region	C/G	SNP95	GTTGCTTGCTACCTCTGTT	CTGTCACGCTCCTACACA	11
SNP96	Pv_Sal1_chr10	1044711	0.44	synonymous_variant	G/C	SNP96	CGCCAACACTGTAATTAGG	CTCCTCCAGATGCTCCTT	11	SNP83
SNP97	Pv_Sal1_chr10	1165520	0.3	intergenic_region	G/T	SNP97	TGAGCAGAAGGTGGAGAC	TGGTGAAGACCTGCGAAA	11
SNP98	Pv_Sal1_chr10	1283767	0.36	synonymous_variant	G/A	SNP98	GATGTAGTGAGGATAAGAATCG	CTAAGTACACACAACTGTCTC	11	SNP84
SNP99	Pv_Sal1_chr11	134776	0.35	synonymous_variant	C/T	SNP99	CCGTGTCGTATATCTGCC	GACTTGCCAGTGGAGAAG	12	SNP85
SNP100	Pv_Sal1_chr11	172089	0.47	intergenic_region	C/G	SNP100	GCCAATTCATACGCATACG	AAACGAGACGAGTGATCC	12	SNP86
SNP101	Pv_Sal1_chr11	271315	0.31	synonymous_variant	A/G	SNP101	CGGTGAGATAGCCAACAA	AGCAACGATACTGTGGTG	12	SNP87
SNP102	Pv_Sal1_chr11	319988	0.4	synonymous_variant	C/T	SNP102	TAGTCGTCCACCGTTAGG	CTACAAATGGGTGTTCATCA	12	SNP88
SNP103	Pv_Sal1_chr11	331612	0.35	intergenic_region	C/T	SNP103	CGAACGAATCATATCTCCAATC	TGCGAATGAGAATGCTTATC	12	SNP89
SNP104	Pv_Sal1_chr11	390586	0.34	synonymous_variant	G/A	SNP104	CCGCCGTGTTGATTCTAT	GGAAGGCAGGTGATAATTTAG	12
SNP105	Pv_Sal1_chr11	404375	0.29	intergenic_region	G/C	SNP105	TTCTCCTCCGCATTTACATT	CTGCTCACTACCCGTTTAG	12	SNP90
SNP106	Pv_Sal1_chr11	495177	0.43	synonymous_variant	T/A	SNP106	GACAACGAGTTGGATGGAA	ATGGCATTATCTGCTTCTGA	12
SNP107	Pv_Sal1_chr11	602489	0.32	synonymous_variant	C/T	SNP107	TCCTTCGTATTCTGCTTCTC	GAACTGTCATTACCCATCCA	12
SNP108	Pv_Sal1_chr11	812519	0.38	synonymous_variant	G/C	SNP108	TGATGGTGGAGAGGCTAT	AGAGAAGGCTAGATGAAGAA	13	SNP91
SNP109	Pv_Sal1_chr11	988980	0.45	intergenic_region	A/T	SNP109	ACTTCTCTGCCGCTTCTC	AGAGAAGGCTAGATGAAGAA	13	SNP92
SNP110	Pv_Sal1_chr11	1015183	0.28	synonymous_variant	C/T	SNP110	GCAGCCGTATTGGAAGAA	CAGCGGACGGTCAACAGGTCAT	13
SNP111	Pv_Sal1_chr11	1108075	0.32	intergenic_region	T/C	SNP111	TTACCGCAGTAGCCATCC	ACGAATTACAGTGCCTATCA	13	SNP93
SNP112	Pv_Sal1_chr11	1154844	0.29	synonymous_variant	G/A	SNP112	GGCTTGAACTTCTCATGTAC	ATATCTGAAGGTGAACATC	13
SNP113	Pv_Sal1_chr11	1326819	0.29	intergenic_region	C/T	SNP113	GTACACCATTGCGTCGTT	ATCTATGCTGAACGAATACG	13	SNP94
SNP114	Pv_Sal1_chr11	1390208	0.41	synonymous_variant	C/A	SNP114	TCTTCGCTGGTCGTTTAC	GGAAACCTTCACCAGAACTT	13
SNP115	Pv_Sal1_chr11	1530072	0.29	intergenic_region	C/T	SNP115	TTCTTATCGTTGCGACCAT	TCCTTGCTTGGCTTCTTC	13	SNP95
SNP116	Pv_Sal1_chr11	1606867	0.36	synonymous_variant	G/A	SNP116	ATGTTGTGGAGGCTCTTC	CATACCTAAGCTGCTAACCT	13	SNP96
SNP117	Pv_Sal1_chr11	1766298	0.34	synonymous_variant	C/T	SNP117	TTAAGGGCTCGTTTGTCAG	CATCTTTCAGGGTGGGTAA	13
SNP118	Pv_Sal1_chr11	1873961	0.49	synonymous_variant	A/G	SNP118	GTCAGCCAAACGGACTAC	CTCATCTGTCCGCCAATG	14	SNP97
SNP119	Pv_Sal1_chr11	1900423	0.38	intergenic_region	C/T	SNP119	CGTCCGTCAACTTGCTAC	CACTCCACTCAAGCCATAA	14	SNP98
SNP120	Pv_Sal1_chr11	1922676	0.29	intergenic_region	A/G	SNP120	GAATTTGTACCTCCGTTCAT	CTTTCGTAGTGTCTCCCATTA	14	SNP99
SNP121	Pv_Sal1_chr11	1967085	0.28	synonymous_variant	T/C	SNP121	TATGGGTTACCTTTCCTTCTC	CACACTCTCAATCGCAATC	14	SNP100
SNP122	Pv_Sal1_chr12	359945	0.38	intergenic_region	G/C	SNP122	TTTCACAAATCCACCTTCTG	AGCACTTCTATCTACAACGG	14	SNP101
SNP123	Pv_Sal1_chr12	541693	0.46	synonymous_variant	G/A	SNP123	TCGTAGCCTGAATATGTTGG	GTTCATGTATTTACGCCCTT	14	SNP102
SNP124	Pv_Sal1_chr12	635806	0.29	intergenic_region	C/A	SNP124	AGAGATGCTACTGATGCTATC	CGACTACCTAGATGTGGATAC	14
SNP125	Pv_Sal1_chr12	755127	0.37	synonymous_variant	T/A	SNP125	CTATTCTTCTTGCCGTCCAT	TCCACCGCTTATTCAA	14	SNP103
SNP126	Pv_Sal1_chr12	763896	0.47	intergenic_region	A/C	SNP126	GAACTTGCCCTGTCACTT	CTTACCCTGTAGTTCCTCAAT	14	SNP104
SNP127	Pv_Sal1_chr12	889956	0.29	intergenic_region	C/A	SNP127	AACTGCTCATGTGCGTAC	TGCTCACTTGGTGAATCG	14
SNP128	Pv_Sal1_chr12	976873	0.31	intergenic_region	G/C	SNP128	ACTGGCTCAACCGCATAT	GCGACACATTACCTTGTTAC	15	SNP105
SNP129	Pv_Sal1_chr12	1154428	0.43	synonymous_variant	G/A	SNP129	CATAAGGAGAGGCAAGGAG	ACATATCGCAGAAGTTGAAC	15	SNP106
SNP130	Pv_Sal1_chr12	1354963	0.41	synonymous_variant	G/T	SNP130	TATGAAGGTGGCTACAACAA	GCAGTTCCTCCTCCTCTT	15	SNP107
SNP131	Pv_Sal1_chr12	1364817	0.3	intergenic_region	C/A	SNP131	CATTGACACTCCTCATTGG	GGTATAGCAACTGGTGGT	15	SNP108
SNP132	Pv_Sal1_chr12	1400249	0.37	intergenic_region	T/C	SNP132	CCTTCGCATCCACATATTATG	CGGCATAGTGTCACAAGAA	15	SNP109
SNP133	Pv_Sal1_chr12	1587147	0.29	intergenic_region	G/A	SNP133	AATTCAACTGCCACAGAGG	TCTCAAACGCTTCTTTCCC	15	SNP110
SNP134	Pv_Sal1_chr12	1623092	0.32	intergenic_region	G/A	SNP134	TATGTAGTATGCCCGTAGGA	CACTCGCAGGCTAATTCTT	15	SNP111
SNP135	Pv_Sal1_chr12	1934907	0.3	intergenic_region	T/A	SNP135	ATCTCCTCGACAGCGTAA	ACCCGAGCGATGAATGTA	16	SNP112
SNP136	Pv_Sal1_chr12	1997388	0.3	intergenic_region	T/G	SNP136	GTGTCTTCCTGCCTACCT	TCCTGATAGACTGTCTCCTC	16	SNP113
SNP137	Pv_Sal1_chr12	2045948	0.44	synonymous_variant	T/C	SNP137	GTAAATGCGTGCCAAATGA	TGTGTCTGTATGAATGTCTCC	16	SNP114
SNP138	Pv_Sal1_chr12	2334285	0.29	intergenic_region	A/T	SNP138	AGGTACCGTTCGCAATTAC	CCGACGTATCTGTACATTAGT	16	SNP115
SNP139	Pv_Sal1_chr12	2420868	0.31	synonymous_variant	A/C	SNP139	CTCATAGGATAACTGCTCAGA	GGAAACGGCGGAACATAT	16	SNP116
SNP140	Pv_Sal1_chr12	2655739	0.47	synonymous_variant	T/G	SNP140	CAGGTCTTCATTAAGCAGAAC	GGCAAGCACTGTATTAGCA	16	SNP117
SNP141	Pv_Sal1_chr12	2679447	0.36	intergenic_region	T/C	SNP141	CCTGCTGAATTAATGTAGAAGG	GGAGAAATGCCCACTGAC	16	SNP118
SNP142	Pv_Sal1_chr12	2685034	0.29	intergenic_region	C/T	SNP142	CTGCCGTTCTTGTCATTC	TAATGTCGTAGTAGGACCAT	16	SNP119
SNP143	Pv_Sal1_chr12	2948003	0.44	synonymous_variant	C/T	SNP143	TCTGTAAATCTGTTGCCTCC	ATGTTAGCAGTTCTCACTTG	16	SNP120
SNP144	Pv_Sal1_chr13	393954	0.43	intergenic_region	A/G	SNP144	TATGATGCGTCTCTACACAT	GGGATAGGCTCTCTACGA	16	SNP121
SNP145	Pv_Sal1_chr13	495453	0.29	synonymous_variant	C/T	SNP145	CGCAGAGGAAGAAGTTCA	CGGACTGACATCTCGTTT	17	SNP122
SNP146	Pv_Sal1_chr13	642259	0.29	intergenic_region	G/A	SNP146	TGTAGTTACTGCCAAAGAGG	AAGACCAACATTGAGGACAT	17
SNP147	Pv_Sal1_chr13	974182	0.33	intergenic_region	A/G	SNP147	AATACACCTCAGCACAGATT	ACTCCATTGGCGATTGATT	17
SNP148	Pv_Sal1_chr13	1189748	0.35	synonymous_variant	A/G	SNP148	GCATCCACGCAATAAGTG	GATTATCGCATAGGGAGAGAT	17	SNP123
SNP149	Pv_Sal1_chr13	1263845	0.45	intergenic_region	C/G	SNP149	TATCTACCTCGCTGGGAAA	CGTTCAATGCCTATCTGTTC	17	SNP124
SNP150	Pv_Sal1_chr13	1373927	0.31	intergenic_region	T/C	SNP150	GGTAAGTTTCGTAACCGTTT	GTGAGGAAGTTGTGAGGAA	17	SNP125
SNP151	Pv_Sal1_chr13	1412767	0.32	synonymous_variant	A/T	SNP151	GCGGCTGTAAGAGGTTAT	TCATTCCTGTTGACGACTT	17	SNP126
SNP152	Pv_Sal1_chr13	1456710	0.49	synonymous_variant	A/T	SNP152	AAGATTGAGGTGCCACAG	CATACACATGGGTAGACACA	17
SNP153	Pv_Sal1_chr13	1961592	0.28	synonymous_variant	C/T	SNP153	TACGCTACGACATCCAGT	CGCTTCCAACTCACAACA	18	SNP127
SNP154	Pv_Sal1_chr14	70279	0.39	intergenic_region	C/A	SNP154	GCATCTTGTATAATCAGTTCCG	GCAACCACAATAACCAGTTC	18	SNP128
SNP155	Pv_Sal1_chr14	352525	0.38	intergenic_region	C/T	SNP155	CCAACTCTGCGACTGTTC	TGCGTATTCTCGTTCACATT	18	SNP129
SNP156	Pv_Sal1_chr14	435627	0.29	intergenic_region	C/T	SNP156	GCGGTGAATAAGAAAGGAAA	GCTGGAGTAGTCCTCATAC	18	SNP130
SNP157	Pv_Sal1_chr14	448347	0.42	intergenic_region	G/A	SNP157	AGAAGCCATTACGCAGAA	CGAACGTGGTCAAGAGTAA	18
SNP158	Pv_Sal1_chr14	465936	0.38	intergenic_region	G/A	SNP158	CTTAGTATCGTCCCTTTGGT	GACAACGATGGCAACAATT	18	SNP131
SNP159	Pv_Sal1_chr14	549192	0.48	intergenic_region	T/G	SNP159	AAGCATCAACTGGAATGGA	TTAGTGAGAGCCTGACCTT	18
SNP160	Pv_Sal1_chr14	603263	0.46	intergenic_region	T/G	SNP160	TCCACTTGGGTGTGACTC	AGGAAGCAATCGGAACAA	18
SNP161	Pv_Sal1_chr14	612033	0.28	synonymous_variant	G/A	SNP161	GATGTGACTCCGCAATTAAC	GAGTTAGCACTTCCCTTCC	18
SNP162	Pv_Sal1_chr14	624225	0.37	intergenic_region	C/T	SNP162	GCCGAGTGAATGTAATGAAC	ATGAACGGATAGACGAATGG	18
SNP163	Pv_Sal1_chr14	662219	0.29	intergenic_region	C/A	SNP163	AAGATTGAGGTGCCACAG	CTGCATACACATGGGTAGACACA	19	SNP132
SNP164	Pv_Sal1_chr14	672313	0.45	intergenic_region	A/G	SNP164	CGCATGTGCTTCTCCAAT	GGCAACTGTAAGTGGTGAA	19
SNP165	Pv_Sal1_chr14	1180106	0.44	synonymous_variant	C/A	SNP165	TACGCTACGACATCCAGT	CGCTTCCAACTCACAACA	19	SNP133
SNP166	Pv_Sal1_chr14	1190809	0.34	synonymous_variant	G/A	SNP166	AGTGCGAACCTTCTCTTG	CAATGACGACACGGTGAA	19	SNP134
SNP167	Pv_Sal1_chr14	1294147	0.4	intergenic_region	G/A	SNP167	AAGCTGCTGTGGACTTAC	TCGCCGAAATGTAAATCTAC	19	SNP135
SNP168	Pv_Sal1_chr14	1360071	0.32	synonymous_variant	G/A	SNP168	GCATCTTGTATAATCAGTTCCG	AGCGCAACCACAATAACCAGTTC	19	SNP136
SNP169	Pv_Sal1_chr14	1591344	0.36	synonymous_variant	A/G	SNP169	GCGGTGAATAAGAAAGGAAA	AGCGCTGGAGTAGTCCTCATAC	19	SNP137
SNP170	Pv_Sal1_chr14	1642294	0.47	intergenic_region	A/G	SNP170	TTGTATGTAGCCTCCCTAGT	AGCGCTTCGCAAACAGTTACAC	19	SNP138
SNP171	Pv_Sal1_chr14	1709491	0.42	intergenic_region	G/A	SNP171	AGAAGCCATTACGCAGAA	CGAACGTGGTCAAGAGTAA	20	SNP139
SNP172	Pv_Sal1_chr14	1709682	0.45	intergenic_region	G/A	SNP172	GGTCTGCCATGACAATGT	CGCACGCATTTACACTTAA	20	SNP140
SNP173	Pv_Sal1_chr14	1741891	0.4	intergenic_region	C/A	SNP173	CTTAGTATCGTCCCTTTGGT	GACAACGATGGCAACAATT	20	SNP141
SNP174	Pv_Sal1_chr14	1838248	0.32	intergenic_region	G/C	SNP174	AGCACATACCGAGGTAGT	TGGCTACAACAGCTTGAG	20	SNP142
SNP175	Pv_Sal1_chr14	1903475	0.45	synonymous_variant	G/A	SNP175	TTTGTTCCACTCCAATTTCG	ACTGTTCTACCTGACCTCTT	20	SNP143
SNP176	Pv_Sal1_chr14	2632512	0.28	intergenic_region	A/T	SNP176	GGTGGGTTAGTGGAGATGT	CCGAATTGAAGGCGTCAC	20	SNP144
SNP177	Pv_Sal1_chr14	2771883	0.33	synonymous_variant	C/T	SNP177	GGAATCTATTTGAGCCCTCT	CCGTGTGGAACTCATCTG	20	SNP145
SNP178	Pv_Sal1_chr14	2785792	0.29	intergenic_region	C/T	SNP178	GATGTGACTCCGCAATTAAC	GAGTTAGCACTTCCCTTCC	20	SNP146
a. MAF= Minor Allele Frequency in Papua New Guinea, b. R/A= Reference / Alternate alleles, Red highlighted SNPs = SNPs from Global P.vivax barcode (Baniecki et al 2015)
